# Supplementary material for: Design and self-assembly of an unconventional peptide-based dicephalic surfactant with an inverted architecture
Source: Royal Society of Chemistry journal article supplement (doi:10.1039/d5sm01282a), 2026-01-01
Supplement: d5sm01282a1.pdf [file d5sm01282a1.pdf]

## Supporting Information

### **Design & Self-assembly of an Unconventional Peptide-Based Dicephalic Surfactant with Inverted Architecture**

*Vinoth Vetrivel<sup>a,b</sup>, Manaswini Gowtham<sup>c</sup>, Madivala G Basavaraj<sup>c</sup>, Vinod K. Aswal<sup>d</sup>, Gopalan  
Akilandeswari,<sup>e</sup> Niraikulam Ayyadurai,<sup>e</sup> Ganesh Shanmugam<sup>a, b\*</sup>*

<sup>[a]</sup> Organic & Bioorganic Chemistry Laboratory, Council of Scientific and Industrial Research

(CSIR) - Central Leather Research Institute (CLRI), Adyar, Chennai, 600020, India

<sup>[b]</sup> Academy of Scientific and Innovative Research (AcSIR), Ghaziabad-201002, India

<sup>[c]</sup> Department of Chemical Engineering, Indian Institute of Technology Madras, Chennai,  
600036, India

<sup>[d]</sup> Solid State Physics Division, Bhabha Atomic Research Center (BARC), Trombay,  
Mumbai 400085, India

<sup>[e]</sup> Biochemistry & Biotechnology Laboratory, Council of Scientific and Industrial Research  
(CSIR) - Central Leather Research Institute (CLRI), Adyar, Chennai, 600020, India

## Table of contents

| Contents                                                                 | Pages |
|--------------------------------------------------------------------------|-------|
| <b>Figure S1.</b> HPLC chromatogram of DiFm-GXY peptide.                 | P2    |
| <b>Figure S2.</b> ESI-MS spectrum DiFm-GXY peptide                       | P3    |
| <b>Figure S3.</b> Dynamic surface tension of DiFm-GXY peptide            | P4    |
| <b>Figure S4.</b> FE-SEM images of DiFm-GXY (0.75 mM) micelle aggregates | P5    |

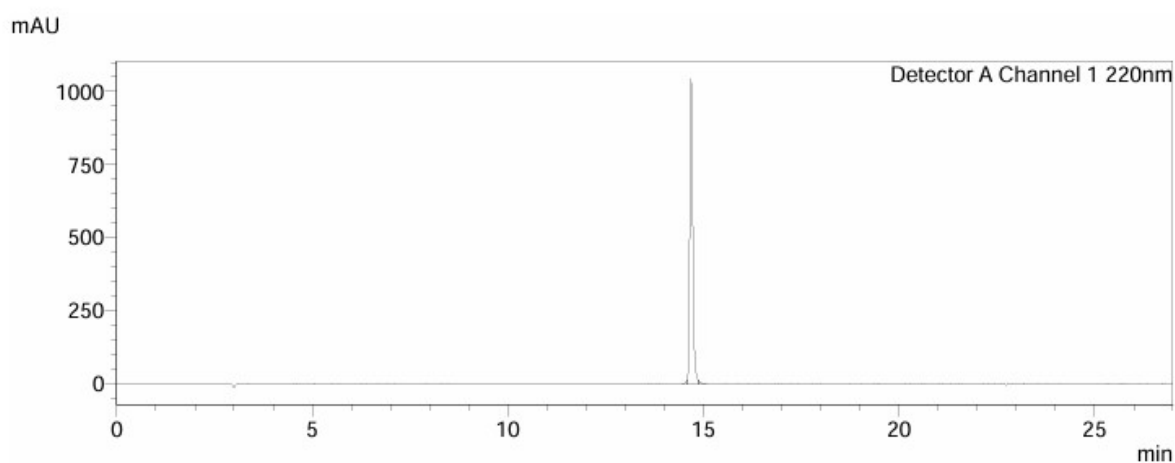

Peak Table

| Detector A Channel 1 220nm |           |         |         |
|----------------------------|-----------|---------|---------|
| Peak#                      | Ret. Time | Area    | Area%   |
| 1                          | 14.579    | 39885   | 0.708   |
| 2                          | 14.684    | 5548188 | 98.509  |
| 3                          | 14.879    | 44097   | 0.783   |
| Total                      |           | 5632170 | 100.000 |

**Figure S1** HPLC chromatogram of DiFm-GXY and its purity analysis.

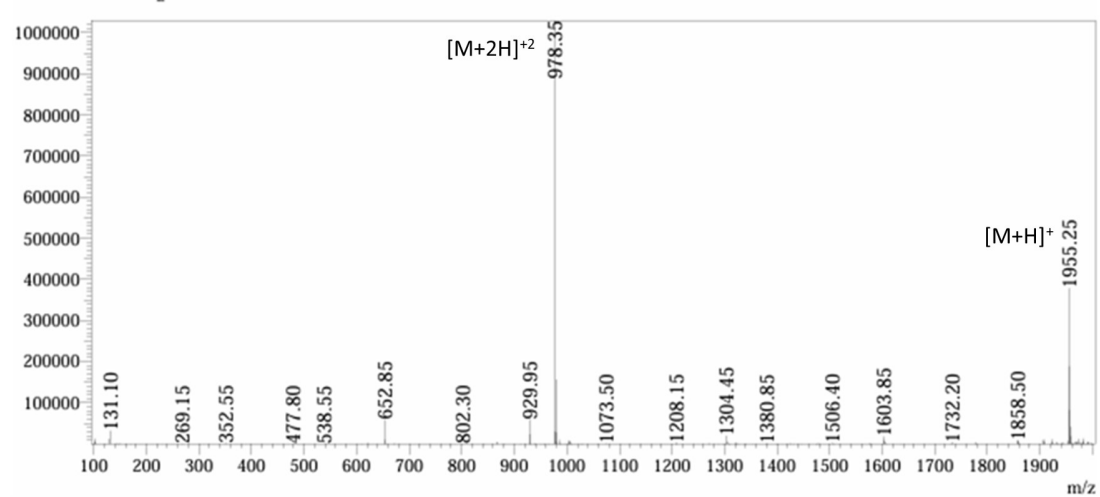

**Figure S2** Electrospray ionization mass spectrum of DiFm-GXY, confirming its molecular weight.

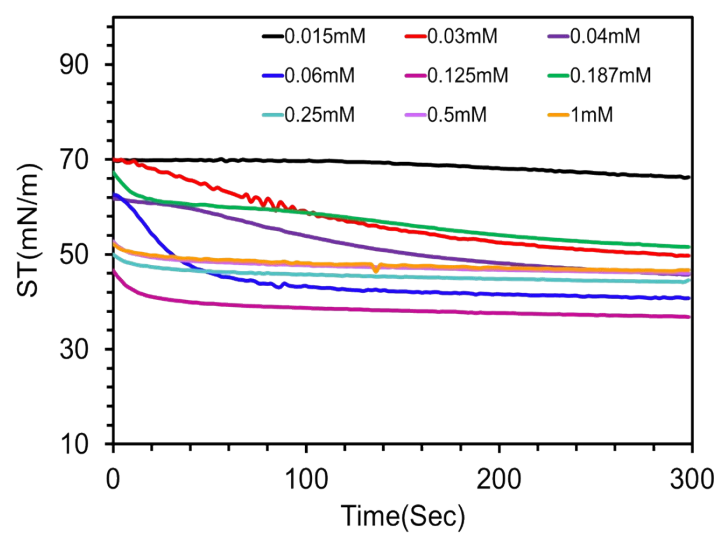

**Figure S3.** Dynamic surface tension (change in surface tension as a function of time) of DiFm-GXZ at different concentrations.

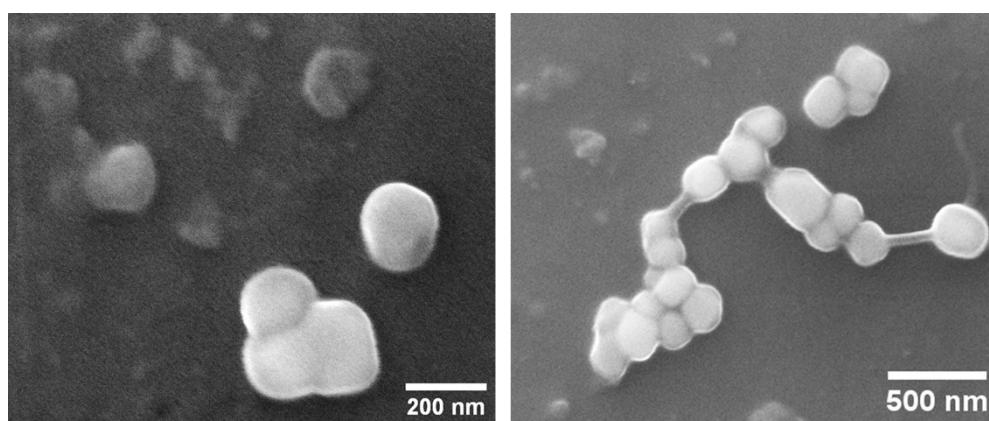

**Figure S4.** FE-SEM images of DiFm-GXY (>CMC, 75  $\mu$ M) Unimicellar aggregates.
